# Supplementary material
Source: publisher site journal article supplement (https://www.dovepress.com/article/481742)
Supplement: Supplementary file 1 [file get_supplementary_file.php]

Table S1. The Sleep Questionnaire

| **Clinical comorbidities in children** | Answer “Yes/No” |
| --- | --- |
| 1. Does your child have enlarged tonsils? |  |
| 1. Does your child have enlarged adenoids? |  |
| 1. Has your child been tested for allergens and diagnosed with allergic rhinitis? |  |
| 1. Has your child been tested for allergens and diagnosed with non-allergic rhinitis? |  |
| 1. Have your child diagnosed with bronchial asthma? |  |
| 1. Have your child been diagnosed with a neuromuscular disease? |  |
| **PSQ-term** |  |
| 1. Did your child stop growing at a normal rate at any time since birth? |  |
| 1. Is your child overweight? |  |
| 1. While sleeping, does your child snore loudly? |  |
| 1. Does your child tend to breath through the mouth during the day |  |
| 1. While sleeping, does your child snore more than half the time? |  |
| 1. While sleeping, does your child always snore? |  |
| 1. Have you ever seen your child stop breathing during the night? |  |
| 1. While sleeping, does your child have trouble breathing, or struggle to breath |  |
| 1. While sleeping, does your child have "heavy" or loud breathing? |  |
| 1. Does your child have a dry mouth on waking up in the morning? |  |
| 1. This child often interrupts or intrudes on others? |  |
| 1. Does your child occasionally wet the bed? |  |
| 1. This child often is "on the go" or often acts as if " driven by a motor" |  |
| 1. This child often fidgets with hands or feets or squirms in seat? |  |
| 1. Does your child wake up feeling unrefreshed in the morning? |  |
| 1. This child often does not seem to listen when spoken to directly? |  |
| 1. Has a teacher or other supervisor commented that your child appears? |  |
| 1. it hard to wake your child up in the morning? |  |
| 1. This child often is easily distracted by extraneous stimuli？ |  |
| 1. Does your child wake up with headaches in the morning? |  |
| 1. This child often has difficulty organizing task and activities？ |  |
| 1. Does your child have a problem with sleepiness during the day? |  |

Table S2. Comparison of POSA and NPOSA data before PSM

| Variables, | NPOSA  (n=750) | POSA  (n=158) | p. value |
| --- | --- | --- | --- |
|  |
| *Age, y | 5.49± (2.71) | 5.84± (2.78) | 0.151 |
| **Male, n (%) | 473 (63.1) | 97 (61.4) | 0.763 |
| *BMI, kg/m2 | 16.8± (3.41) | 18.0± (4.18) | 0.001 |

*means±(SD), ** N (%)

Table S3. Chi-square test for POSA and NPOSA among bronchial asthma groups after PSM

|  | NPOSA | POSA |  | P-value |
| --- | --- | --- | --- | --- |
| Bronchial asthma |  |  | <0.001 | 1 |
| Yes, n (%) | 17 (5.6) | 8 (5.2) |
| No, n (%) | 289(94.4) | 145 (94.8) |

**Abbreviations:** PSM, propensity score matching; BMI, body mass index.


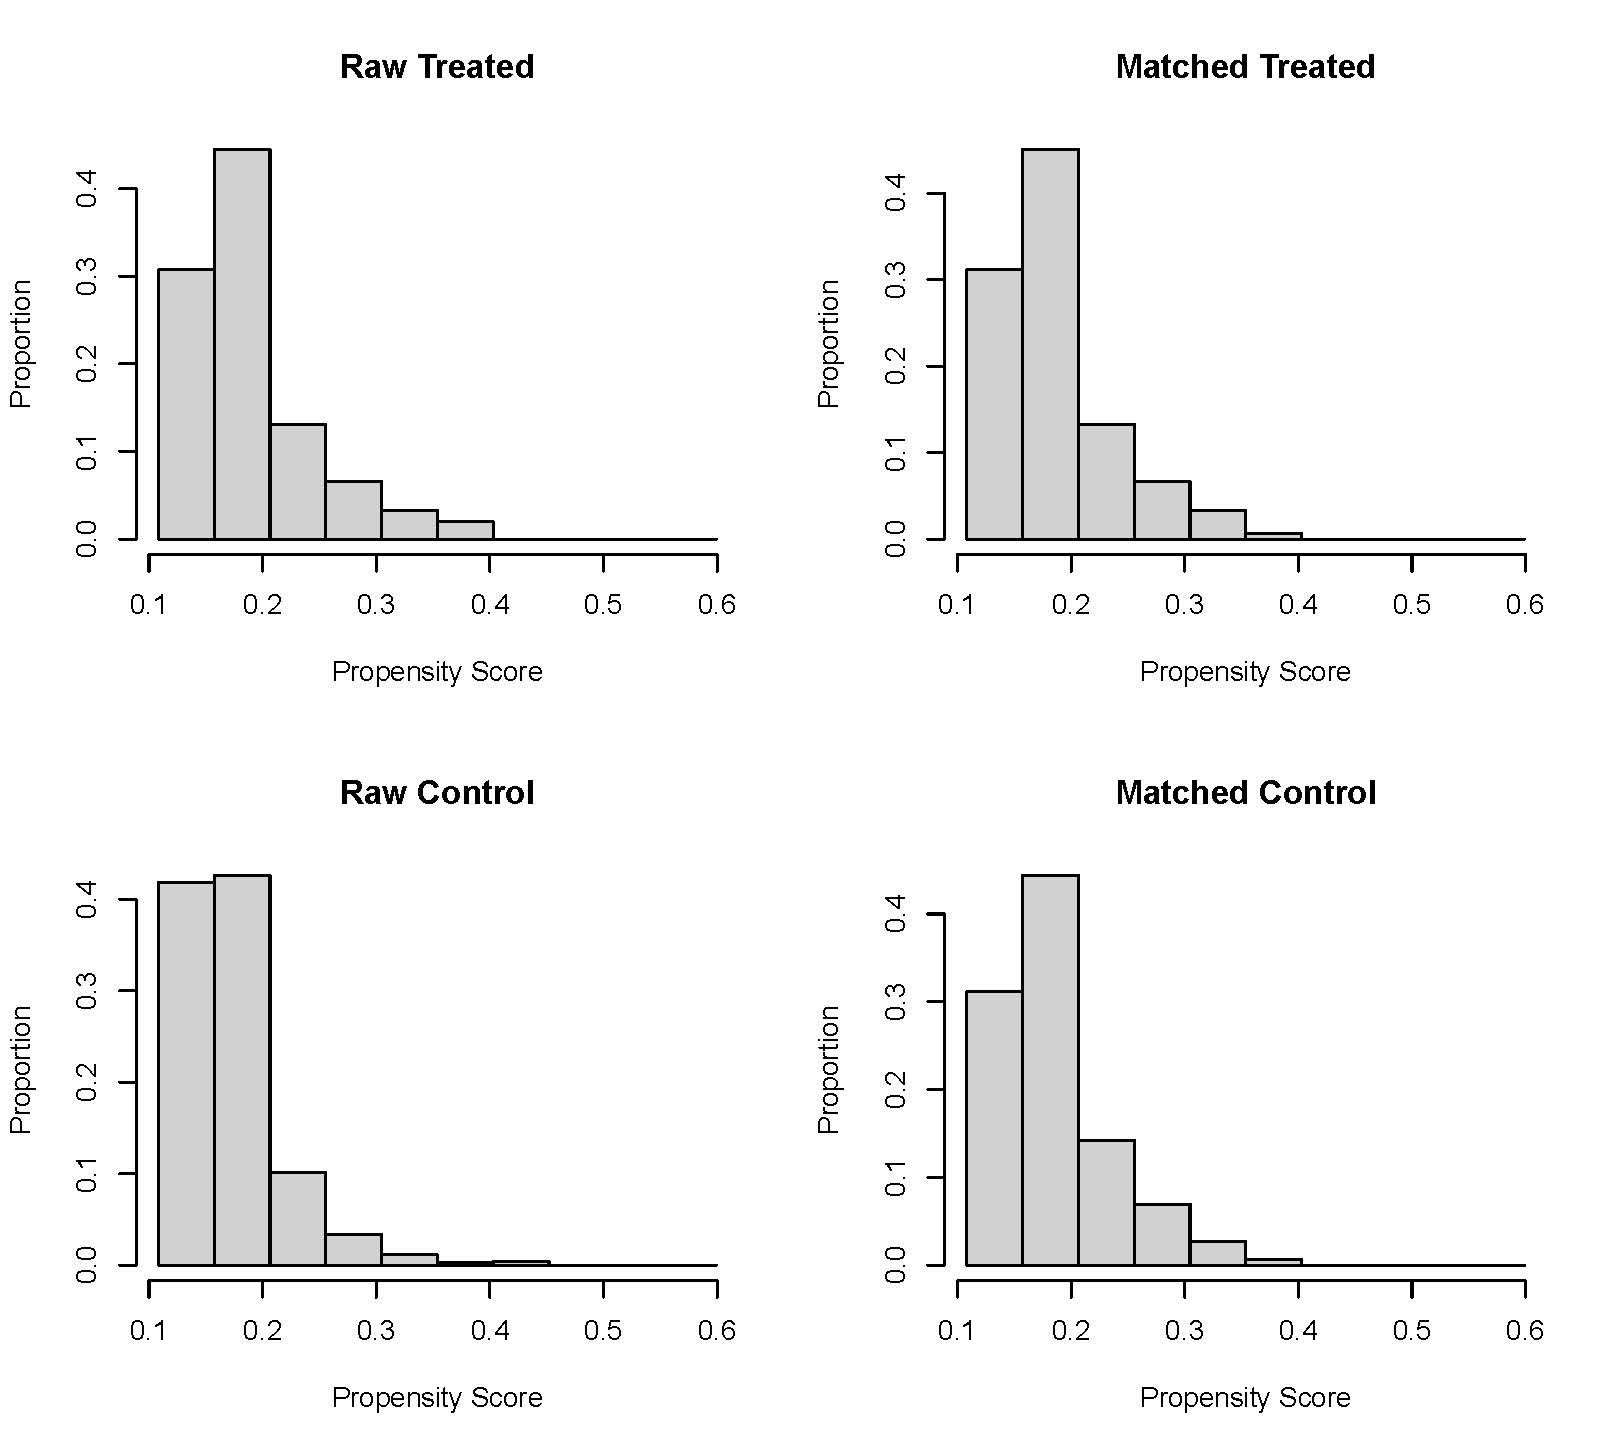


**Figure S1** Balance Plot for Propensity Score Matching
